# Supplementary material for: Fabrication of superhydrophobic surface with discarded silicone under arc exposure
Source: Royal Society of Chemistry journal article supplement (doi:10.1039/c5ra21601j), 2015-01-01
Supplement: c5ra21601j1.pdf [file c5ra21601j1.pdf]

## Fabrication of Superhydrophobic Surface with Discarded Silicone under Arc Exposure

Zhengyong Huang, Jian Li\*, Feipeng Wang, Xinzhu Yan, Yuan Wei

### Supporting Information

#### SI.1.

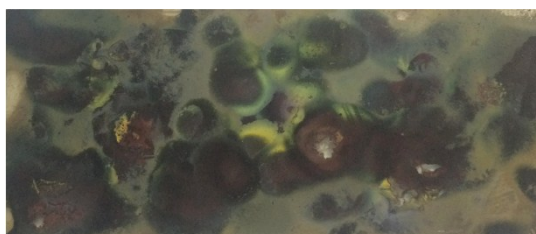

Fig. 1S. Photo of the glass slide coated with silicone aged by serious arc discharges.

#### SI.2.

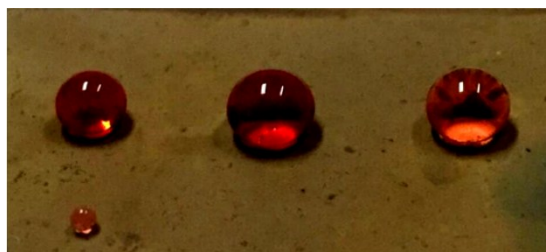

Fig. 2S. Photo of water droplets on superhydrophobic surface after sand abrasion test.

#### SI.3.

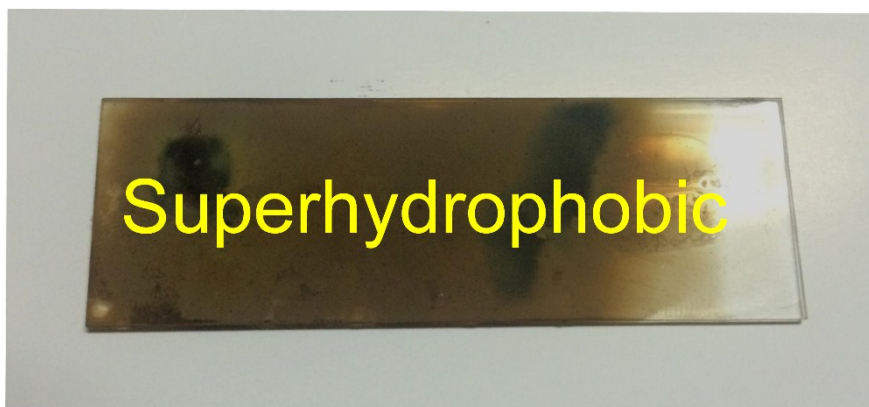

**Fig. 3S.** Photo of superhydrophobic coating on the silicone after arc exposure.

#### **SI.4. vedio for self-cleaning of NaCl.**
